# Supplementary material for: Intracellular delivery of BSA by phosphonate@silica nanoparticles
Source: Royal Society of Chemistry journal article supplement (doi:10.1039/c5tb00555h), 2015-01-01
Supplement: c5tb00555h1.pdf [file c5tb00555h1.pdf]

## Supplementary information for Manuscript ID TB-ART-03-2015-000555

Paper: Intracellular Delivery of BSA by Phosphonate@Silica Nanoparticles

Sai Prakash Maddala, Diana Velluto, Giulia Mastroianni and Alice C. Sullivan\*

School of Biological and Chemical Science Queen Mary University of London Mile End Road London E14NS

### S1: Solid state NMR of PMSN

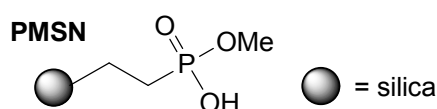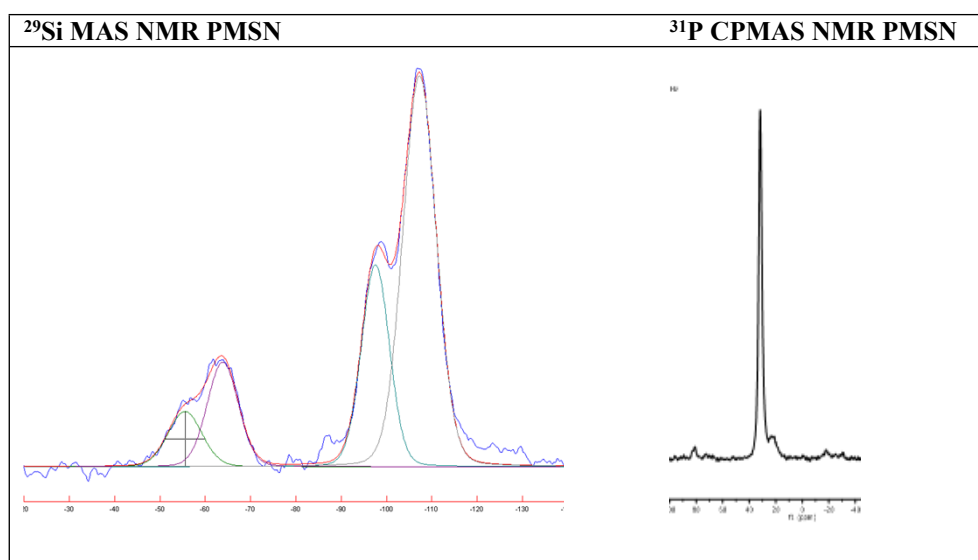

Solid state spectra were obtained using a Bruker AMX 600MHz instrument:  $^{29}\text{Si}$  HPDec MAS, frequency 119.2 MHz, spinning speed 12 kHz; 1 minute recycle delay, with  $2\ \mu\text{s} \sim 45^\circ$  pulse;  $^{31}\text{P}$  CPMAS; frequency 242.9 MHz, spinning speed 12 kHz, 1 ms contact time, 1.5 s delay,  $90^\circ$  pulse for  $2.0\ \mu\text{s}$ .

#### Solid state $^{31}\text{P}$ and $^{29}\text{Si}$ NMR data with deconvolution analysis for PMSN

|                                                       |                                                                                                                                                                                                    |                                      |                                                                                                                    |                                |
|-------------------------------------------------------|----------------------------------------------------------------------------------------------------------------------------------------------------------------------------------------------------|--------------------------------------|--------------------------------------------------------------------------------------------------------------------|--------------------------------|
| phosphonate mmol /g = 2.5<br>molar ratio P:Si = 0.22) | $\square_{^{29}\text{Si}}$ T <sup>2</sup> -55.3, T <sup>3</sup> ,-63.9,Q <sup>3</sup> ,-98.6,Q <sup>4</sup> -106.9<br>((%)T <sup>2</sup> 8, T <sup>3</sup> 14,Q <sup>3</sup> 24,Q <sup>4</sup> 54) | % Condensation in T,Q sites<br>88,92 | (%)T of surface coverage <sup>a</sup><br>$\text{T}^2 + \text{T}^3 / (\text{Q}^3 + \text{T}^2 + \text{T}^3) = 48\%$ | $\square_{^{31}\text{P}}$ 35.6 |
|-------------------------------------------------------|----------------------------------------------------------------------------------------------------------------------------------------------------------------------------------------------------|--------------------------------------|--------------------------------------------------------------------------------------------------------------------|--------------------------------|

<sup>a</sup> S. Huh, J. W. Wiench, J. C. Yoo, M. Pruski, and V. S. Y. Lin, *Chem. Mater.*, 2003, **15**, 4247-4256.

## S2: UV-vis absorption spectra and fluorescence spectra of PMSN\*

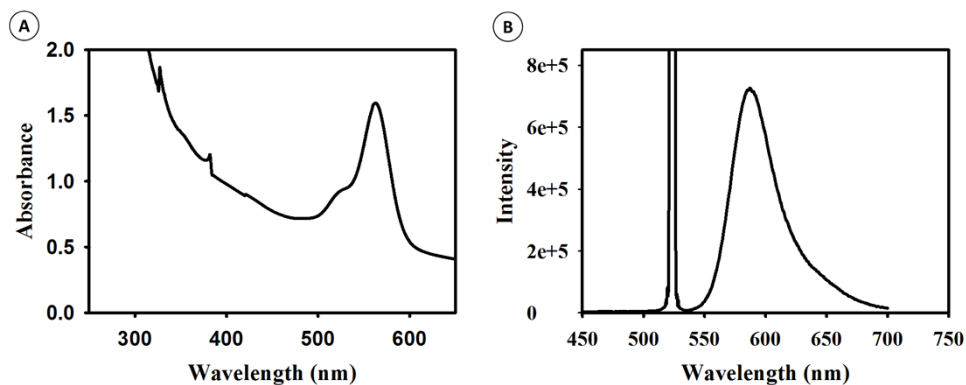

A) UV-Vis spectrum PMSN\* (in PBS (pH 7.40) at 1 mg/mL)

B) Fluorescence spectrum PMSN\* in PBS (pH 7.40) at 1 mg/mL ( $\lambda_{\text{ex}}$  524nm)<sup>a</sup>

<sup>a</sup>K. Hashimoto, M. Hiramoto and T. Sakata, *J. Phys. Chem.*, 1988, **92**, 4272-4274.

## S3: UV-vis absorption spectra and fluorescence spectra of BSA<sup>#</sup>

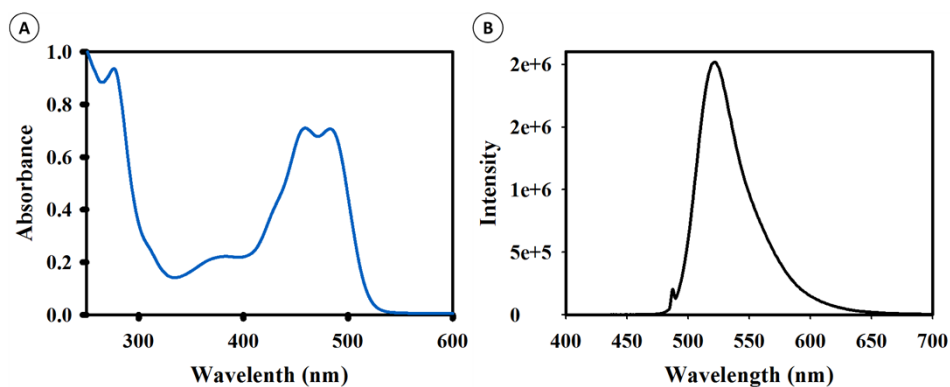

A) UV-Vis spectrum of BSA<sup>#</sup> (in PBS (pH 7.40) at 1 mg/mL)

B) Fluorescence spectrum of BSA<sup>#</sup> in PBS (pH 7.40) at 0.3 mg/mL ( $\lambda_{\text{ex}}$  488 nm)<sup>a</sup>

<sup>a</sup>M. Bruchez Jr., M. Moronne, P. Gin, S. Weiss, A. P. Alivisatos, *Science*, 1998, **281**, 2013-2016.

#### S4: BSA and BSA<sup>#</sup> adsorption study (Langmuir fit)

The effect of fluorescent dye labelling on the adsorption properties on the nanoparticles and proteins was studied and the data was fitted using Langmuir equation (equation 1). While both samples showed similar adsorption profiles and exhibited Langmuir type adsorption, the maximum protein load on the nanoparticles (calculated at  $C_0$  0.5 mg/mL protein concentration) was lower for BSA<sup>#</sup> adsorption on PMSN\*.

$$q = \frac{q_m K_L C_0}{1 + K_L C_0} \text{----- Equation 1}^a$$

$C_0$  is the equilibrium concentration,  $q_m$  is maximum load,  $K_L$  is the Langmuir constant

| Protein          | Nanoparticles | Maximum load*<br>( $q_m$ , mg/g) | Langmuir constant ( $K_L$ ,<br>mL/mg) | R <sup>2</sup> (Langmuir fit) |
|------------------|---------------|----------------------------------|---------------------------------------|-------------------------------|
| BSA              | PMSN          | 653.0                            | 2.08                                  | 0.996                         |
| BSA <sup>#</sup> | PMSN*         | 544.4                            | 2.79                                  | 0.986                         |

\* At protein concentration of 0.5 mg/mL

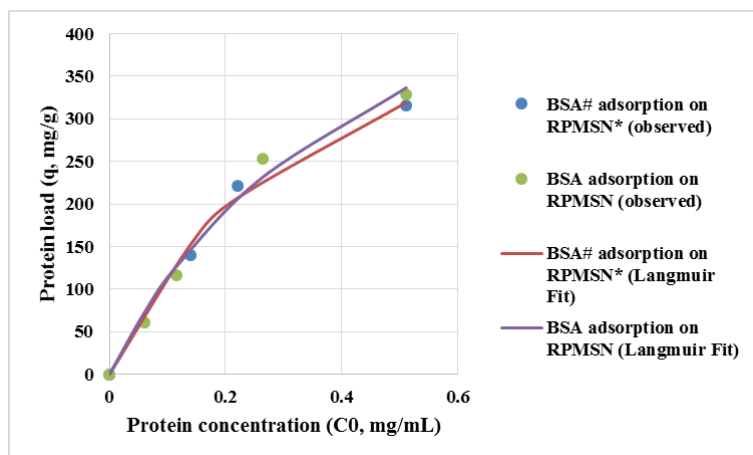

<sup>a</sup>S. H. Brewar, W. R. Glomm, M. C. Johnson, M. K. Knag and S. Franzen, *Langmuir*, 2005, **21**, 9303-9307.

### S5: Time dependent uptake of the PMSN\* nanoparticles

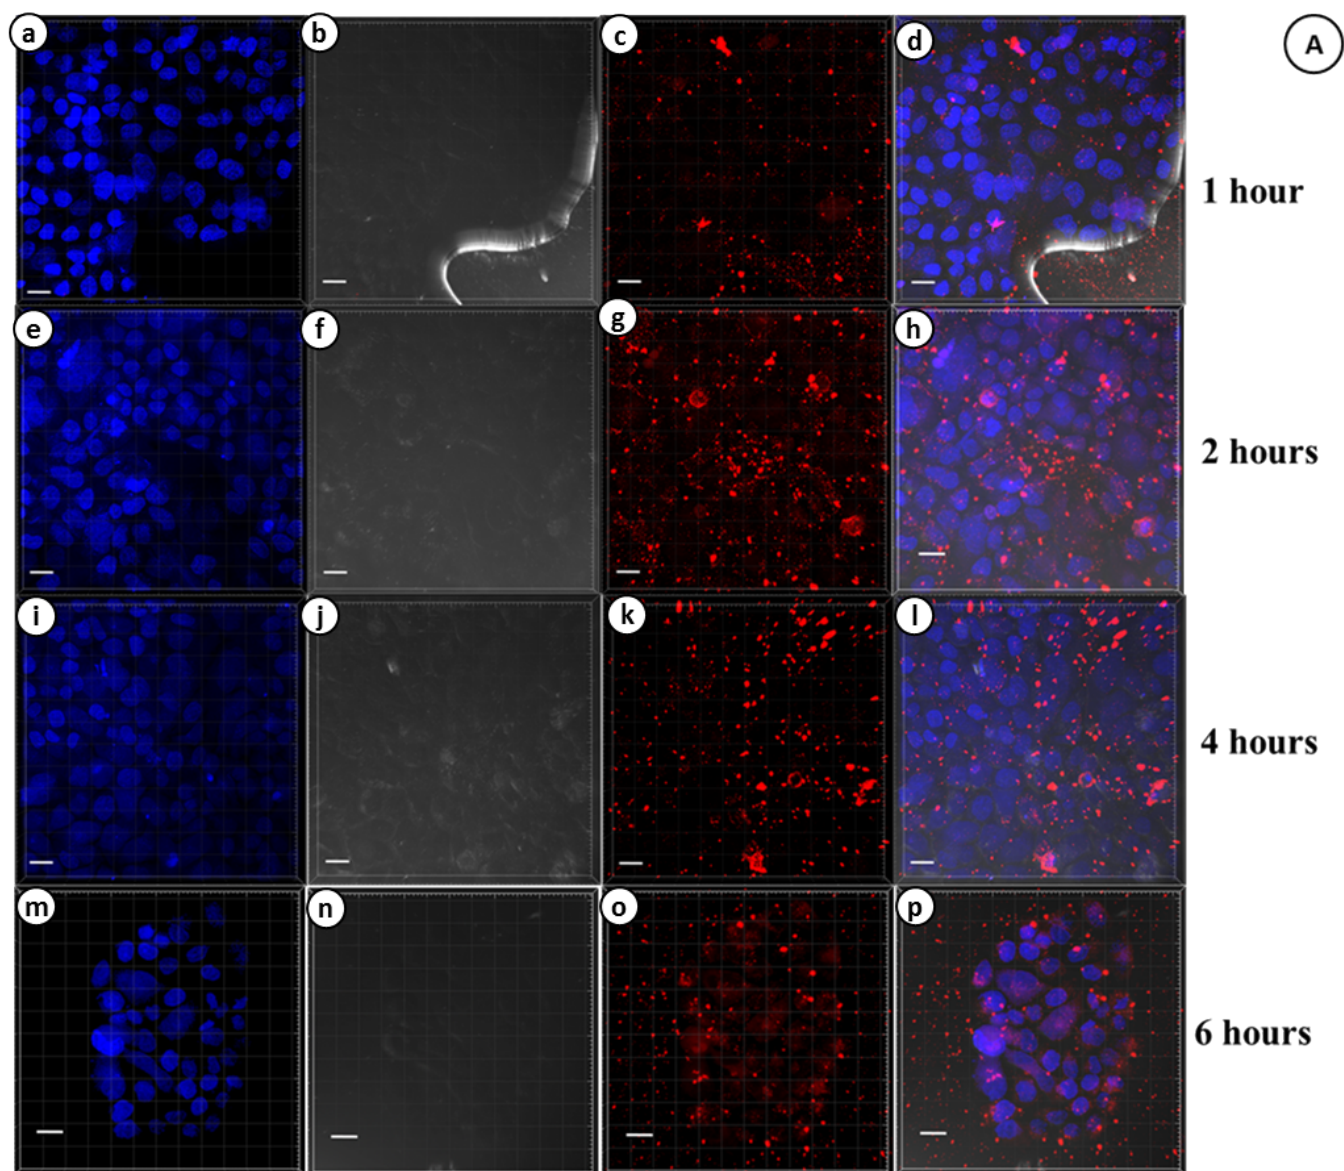

**Figure S5: A)** Time dependent uptake of PMSN\* nanoparticles by HeLa cells (left to right for each time point) (Scale 20  $\mu\text{m}$ ) Blue features are DAPI stained cell nuclei and red spots are due to Rhodamine labelled nanoparticles PMSN\*, merged images on right.

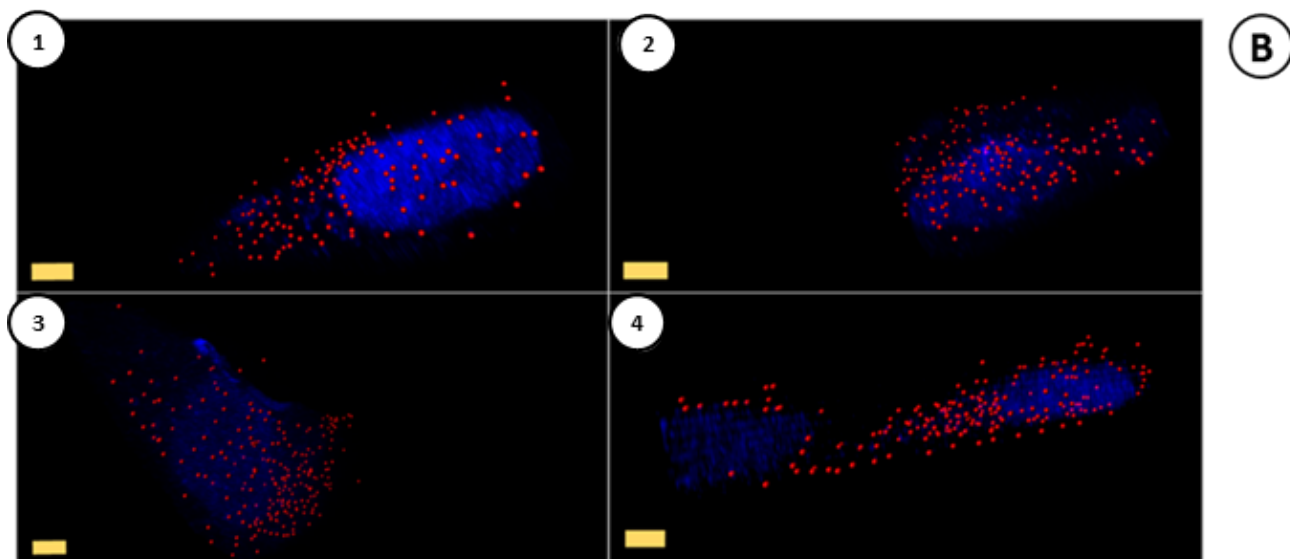

**Figure S5:** B) 3D distribution of PMSN\* nanoparticles in HeLa cells at different exposure times (Scale bar 10  $\mu\text{m}$  in all images); **1)** 1 hour; **2)** 2 hours; **3)** 4 hours and **4)** 6 hours. Blue features are DAPI stained cell nuclei and red spots are due to Rhodamine labelled nanoparticles PMSN\*.

# **S6: Time dependent uptake of the BSA<sup>#</sup>@PMSN\* nanoparticles**

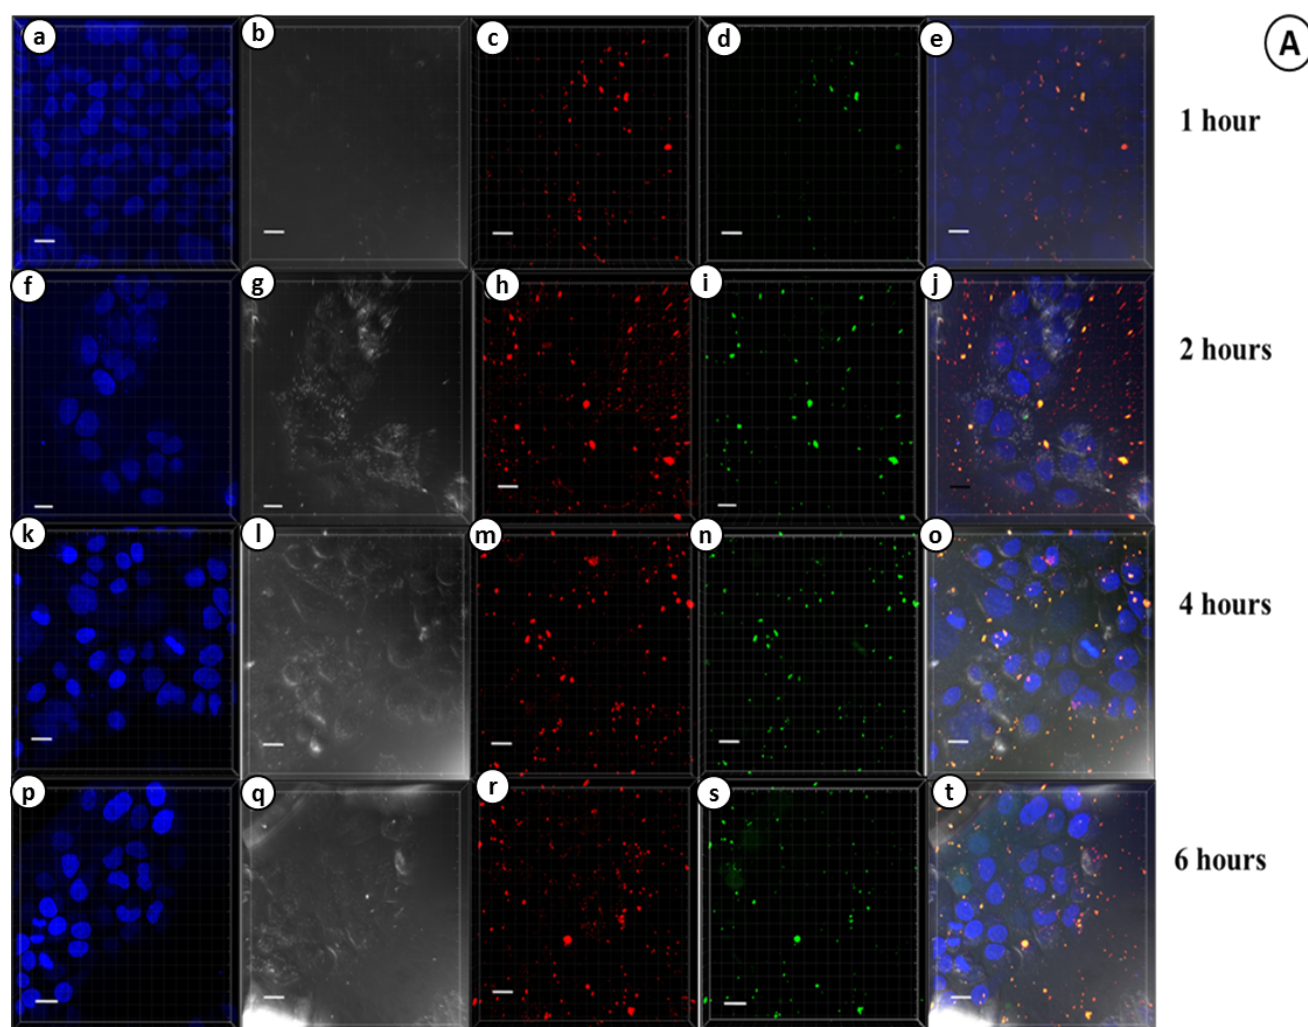

**Figure S6: A)** Time dependent uptake of BSA<sup>#</sup>@PMSN\* by HeLa cells, (left to right for each time point) (Scale 20  $\mu$ m). Blue features are DAPI stained cell nuclei, red spots are due to Rhodamine labelled nanoparticles PMSN\* and the green spots are due to Fluorescein labelled protein BSA<sup>#</sup>, merged images on the right hand side.

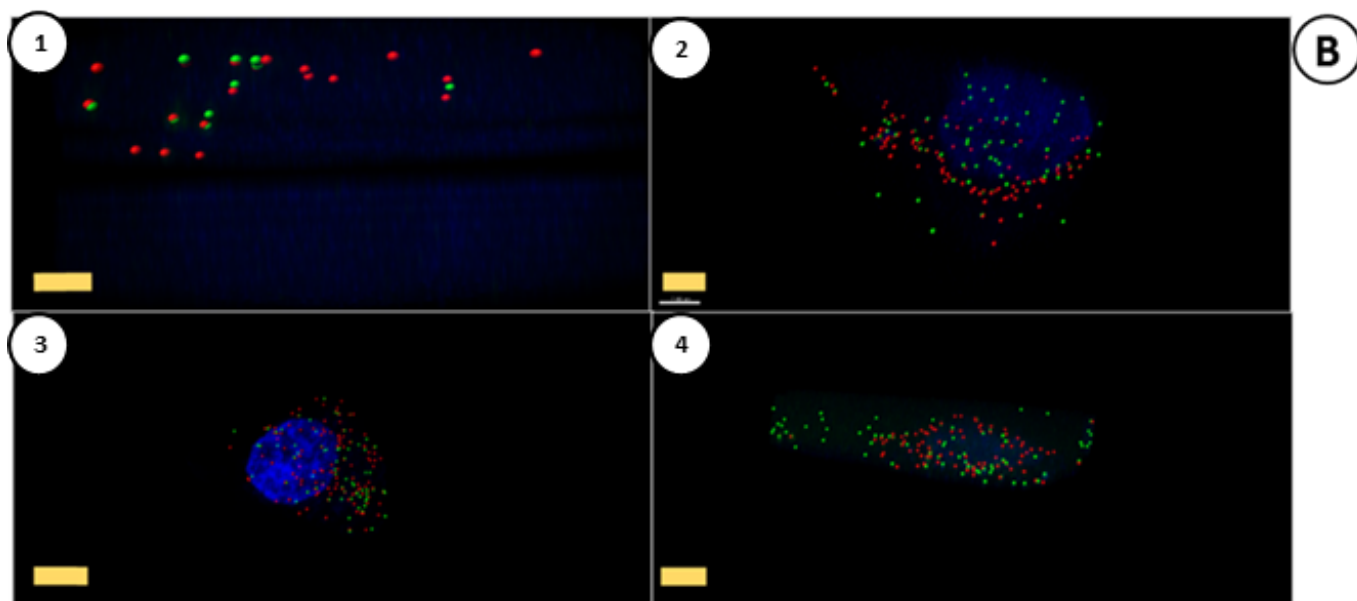

**Figure S6:** B) 3D distribution of BSA<sup>#</sup>@PMSN\* in HeLa cells at different exposure times; **1)** 1 hour (Scale bar 5  $\mu\text{m}$ ); **2)** 2 hours (Scale bar 7  $\mu\text{m}$ ); **3)** 4 hours (Scale bar 10  $\mu\text{m}$ ) and **4)** 6 hours (Scale bar 5  $\mu\text{m}$ ). Blue features are DAPI stained cell nuclei, red spots are due to Rhodamine labelled nanoparticles PMSN\* and the green spots are due to Fluorescein labelled protein BSA<sup>#</sup>.



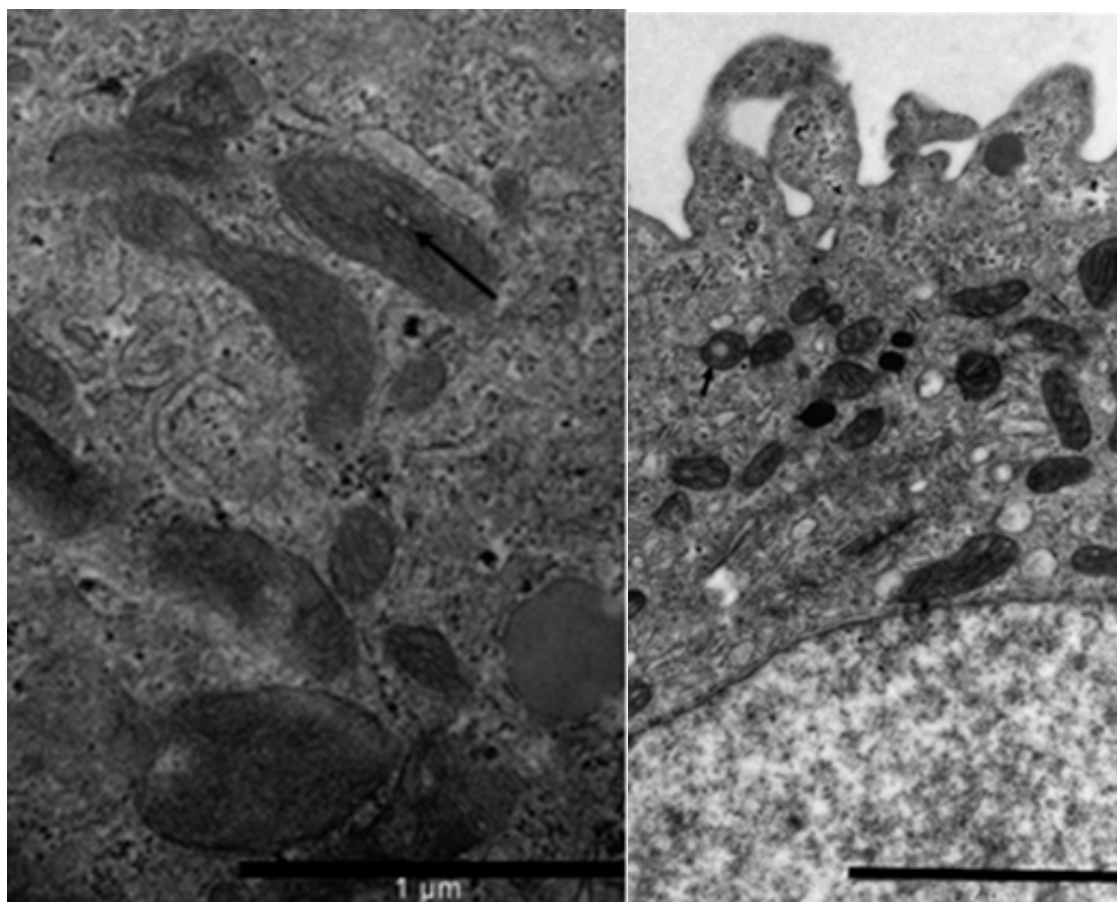

**Figure S6: C) Additional TEMs showing possible localisation (black arrows) of BSA<sup>#</sup>@PMSN<sup>\*</sup> nanoparticles in mitochondria (scale bar = 1μm).**



**S7: BSA<sup>#</sup> load dependent uptake of the BSA<sup>#</sup>@PMSN\* nanoparticles**

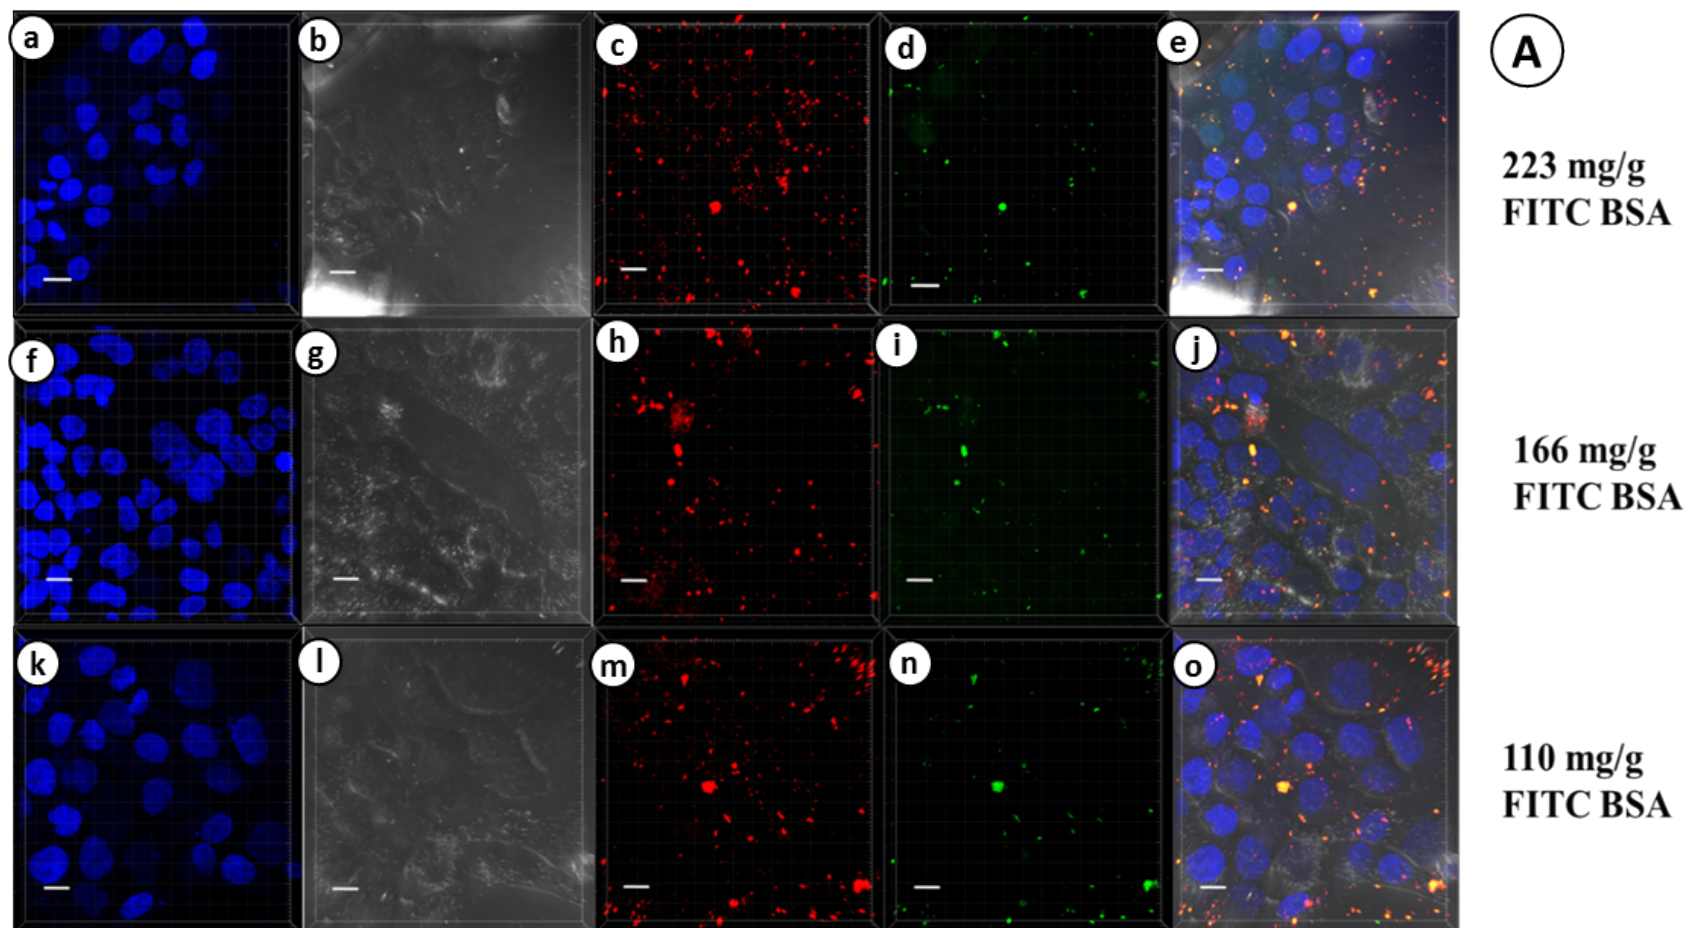

**Figure S7:** A) Confocal microscope images showing the effect of protein load in BSA<sup>#</sup>@PMSN\* particles on particle uptake, (left to right for each BSA<sup>#</sup> load) (Scale bar 20  $\mu$ m). Blue features are DAPI stained cell nuclei, red spots are due to Rhodamine labelled nanoparticles PMSN\* and the green spots are due to Fluorescein labelled protein BSA<sup>#</sup>, merged images on the right hand side.

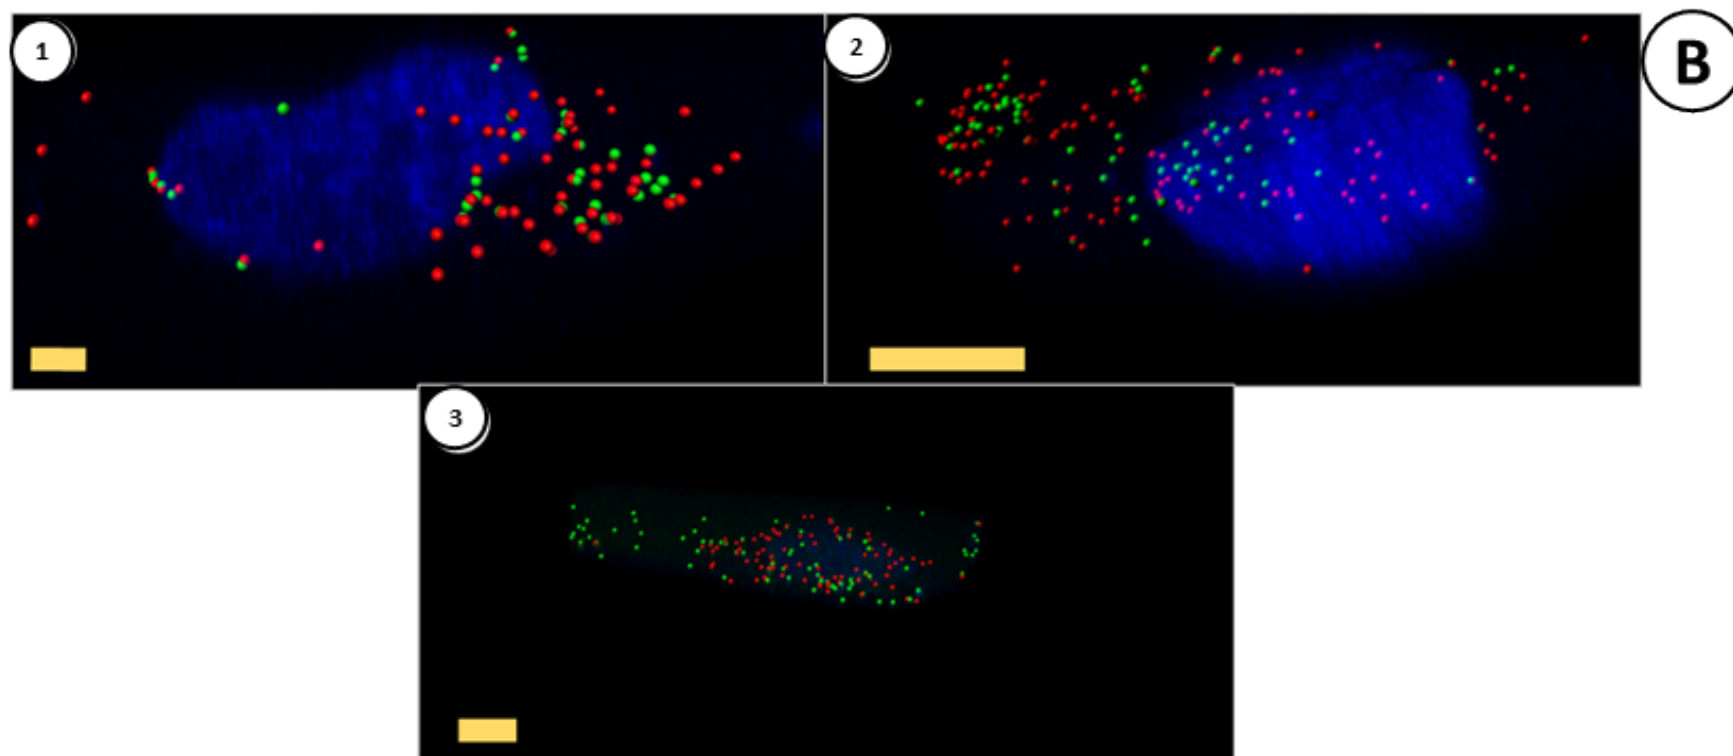

**Figure S7 B)** 3D distribution of BSA<sup>#</sup>@PMSN\* nanoparticles in HeLa cells at different protein load; **1)** 111.1 mg/g (Scale bar 5  $\mu$ m); **2)** 166.7 mg/g (Scale bar 5  $\mu$ m); **3)** 223.0 mg/g (Scale bar 10  $\mu$ m); Blue features are DAPI stained cell nuclei, red spots are due to Rhodamine labelled nanoparticles PMSN\* and the green spots are due to Fluorescein labelled protein BSA<sup>#</sup>.

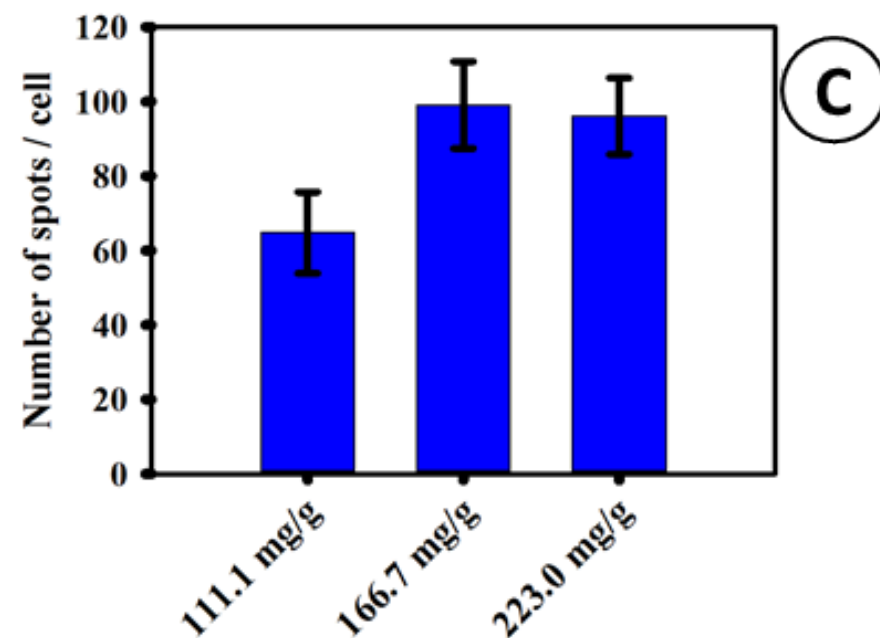

**Figure S7 C)** BSA<sup>#</sup>@PMSN\* Particle uptake versus protein load. (n = 20 ± SEM.)

**S8: Effect of incubation in DMEM on PMSN\* loaded HeLa cells**

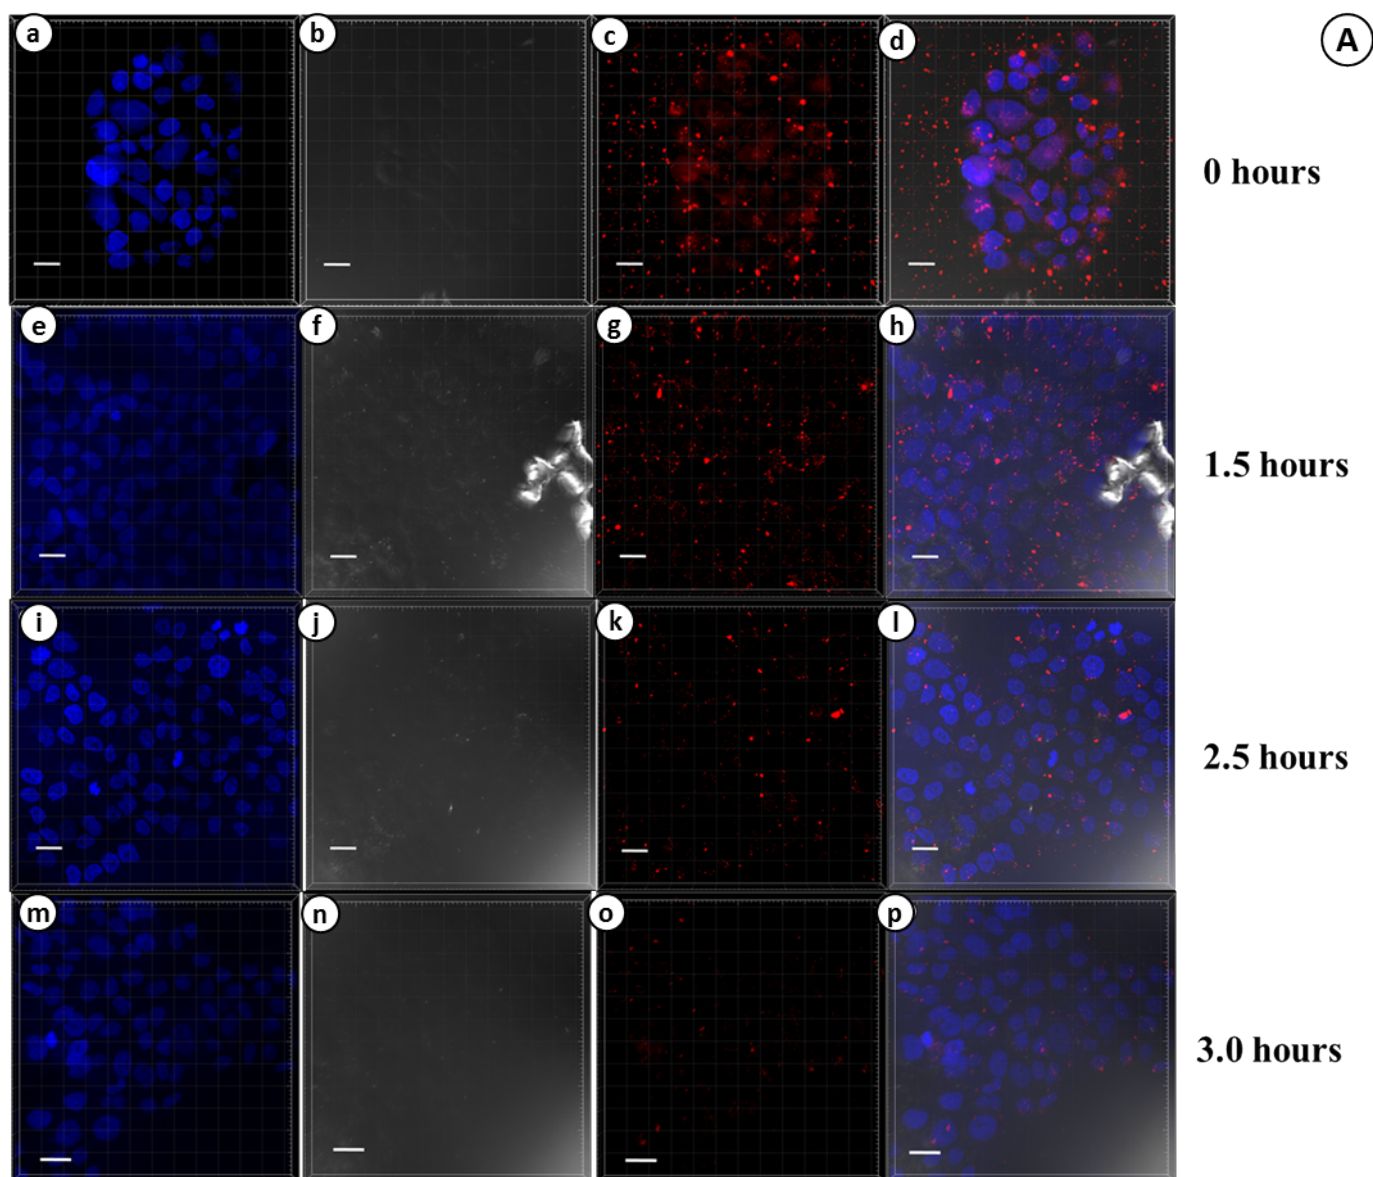

**Figure S8: A)** Effect of incubation in DMEM on PMSN\* in HeLa cells, (left to right for each time point, control at 0 hours) (Scale 20  $\mu\text{m}$ ). Blue features are DAPI stained cell nuclei and red spots are due to Rhodamine labelled nanoparticles PMSN\*, merged images on right.

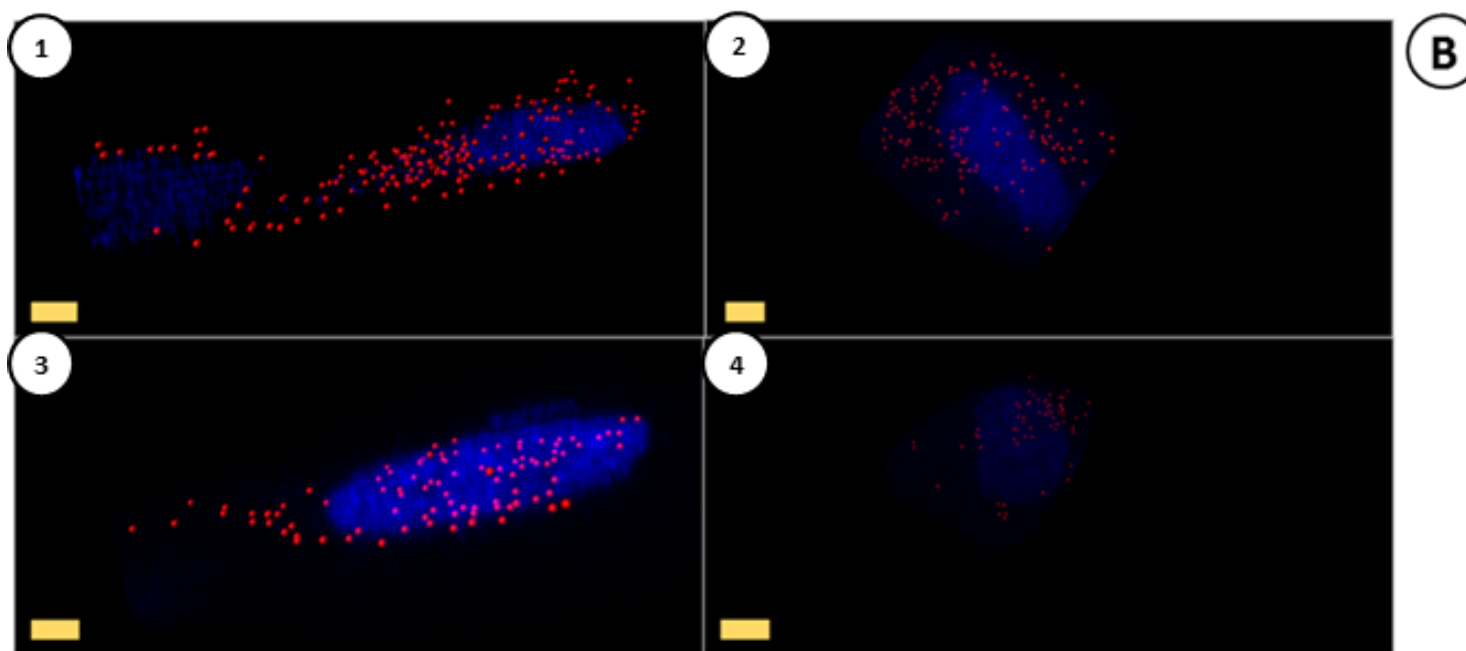

**Figure S8:** B) 3D Distribution of PMSN\* nanoparticles in HeLa cells at different incubation times in particle free media; **1)** 0 hours (Scale bar 10  $\mu\text{m}$ ); **2)** 1.5 hours (Scale bar 10  $\mu\text{m}$ ); **3)** 2.5 hours (Scale bar 10  $\mu\text{m}$ ) and **4)** 3 hours (Scale bar 10  $\mu\text{m}$ ). ). Blue features are DAPI stained cell nuclei and red spots are due to Rhodamine labelled nanoparticles PMSN\*.



**S9: Effect of incubation in DMEM on BSA<sup>#</sup>@PMSN\* loaded HeLa cells.**

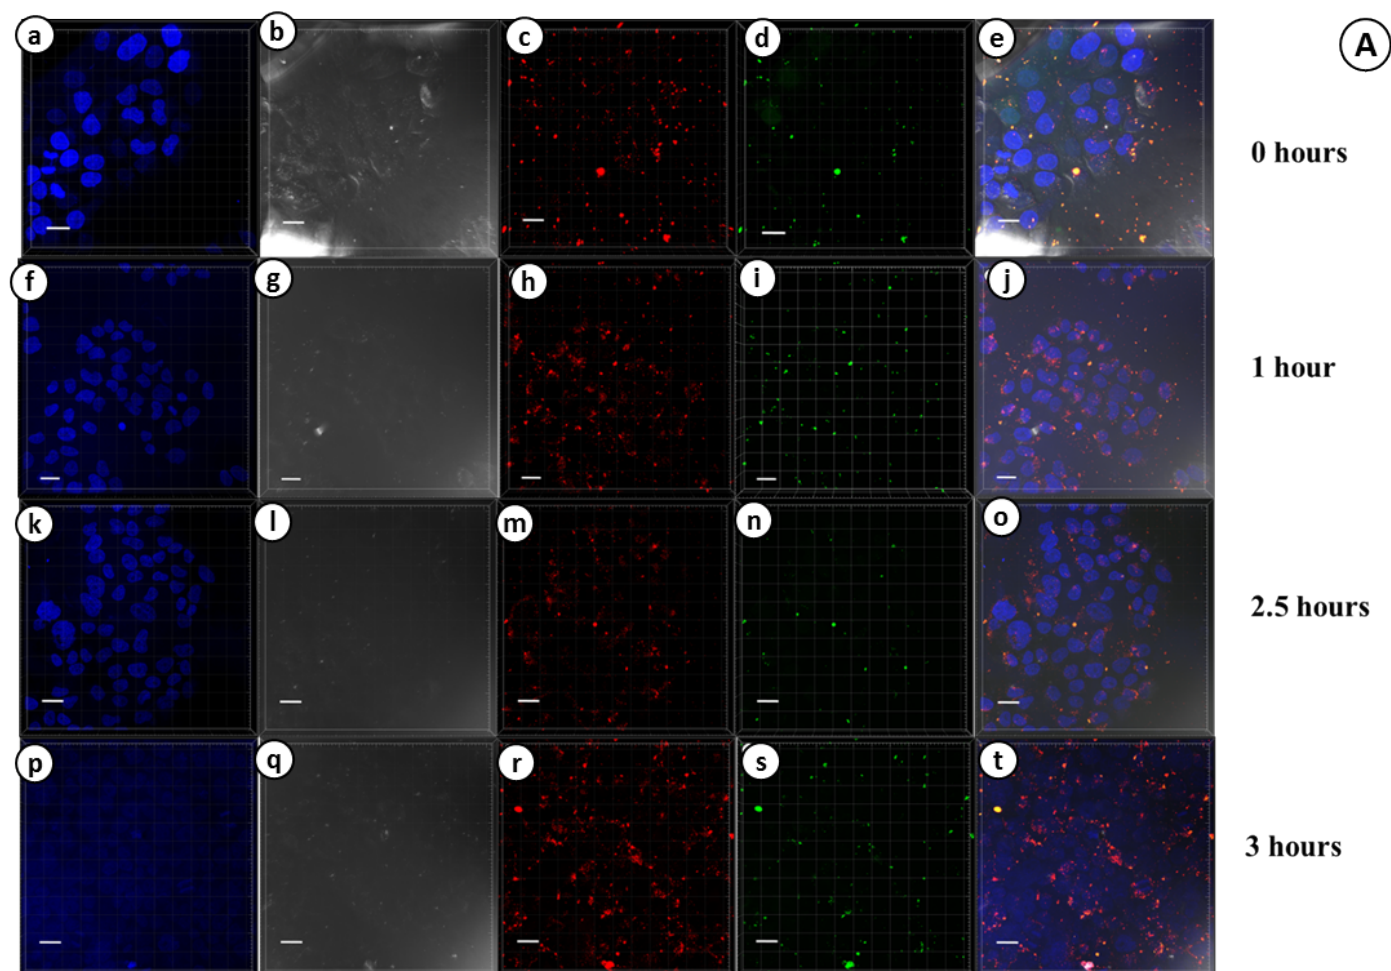

**Figure S9:** A) Effect of incubation in DMEM on BSA<sup>#</sup>@PMSN\* in HeLa cells, (left to right for each time point, control at 0 hours) (Scale 20 μm). Blue features are DAPI stained cell nuclei, red spots are due to Rhodamine labelled nanoparticles PMSN\* and the green spots are due to Fluorescein labelled protein BSA<sup>#</sup>, merged images on the right hand side.



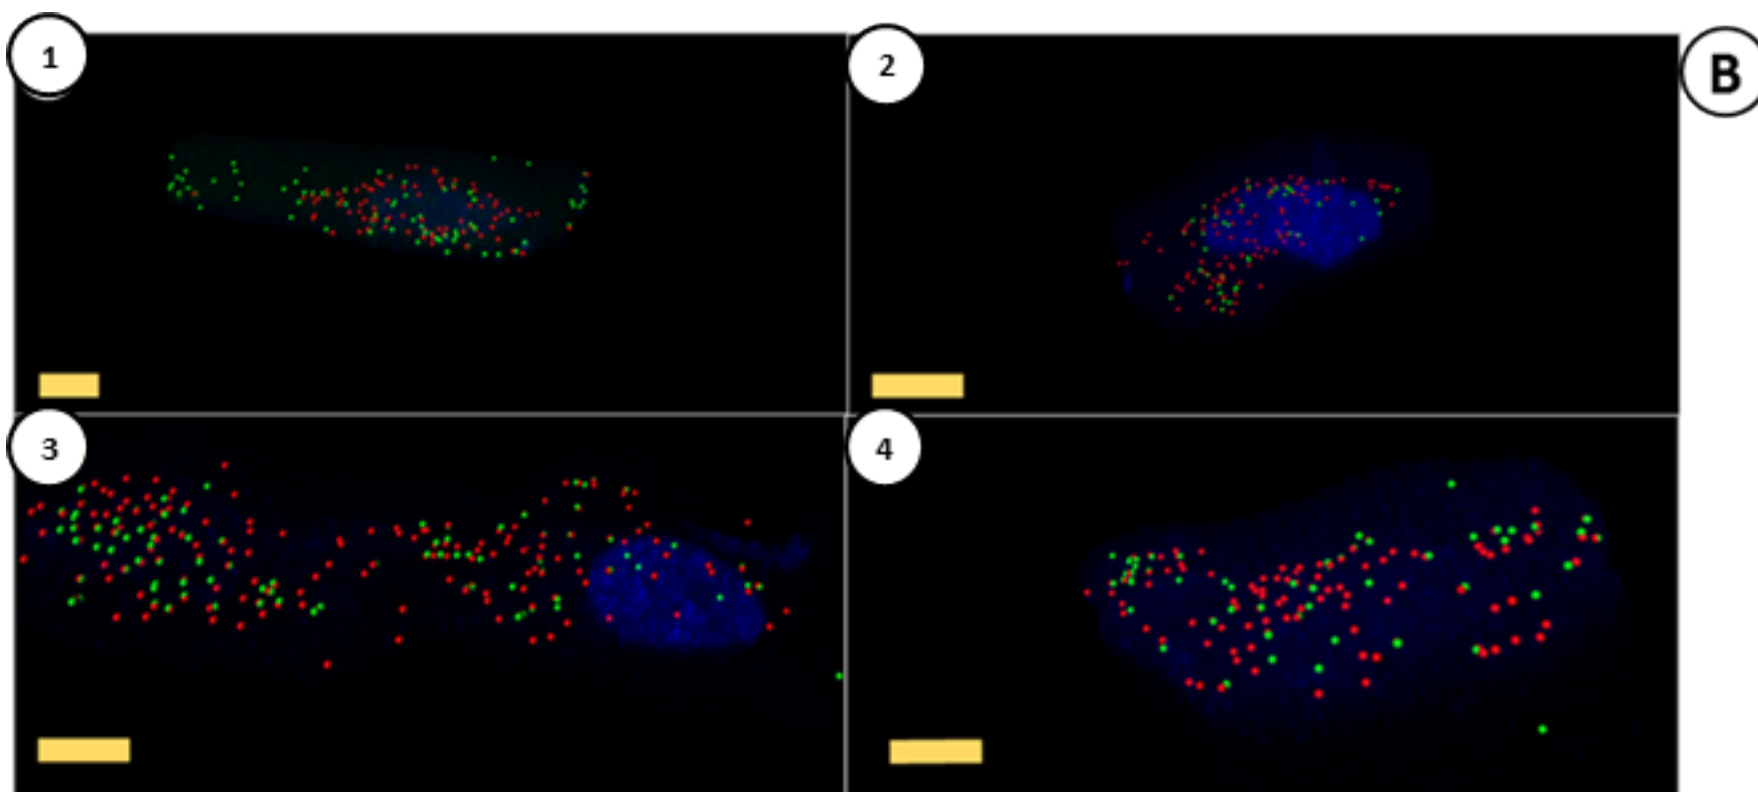

**Figure S9:** B) 3D Distribution of BSA<sup>#</sup>PMSN\* nanoparticles in HeLa cells at different incubation times in particle free media; **1**) 0 hours (Scale bar 10  $\mu\text{m}$ ); **2**) 1.5 hours (Scale bar 10  $\mu\text{m}$ ); **3**) 2.5 hours (Scale bar 10  $\mu\text{m}$ ) and **4**) 3 hours (Scale bar 10  $\mu\text{m}$ ). Blue features are DAPI stained cell nuclei, red spots are due to Rhodamine labelled nanoparticles PMSN\* and the green spots are due to Fluorescein labelled protein BSA<sup>#</sup>.
